# Supplementary material for: Increased Expression of VANGL1 Is Predictive of Lymph Node Metastasis in Colorectal Cancer: Results from a 20-Gene Expression Signature
Source: PubMed Central journal article supplement (PMC7918343; doi:10.3390/jpm11020126), 2021-02-14
Supplement: jpm-11-00126-s001.pdf [file jpm-11-00126-s001.pdf]

Table S1: Logistic Regression Test of the 20 Genes (Analysis – Metastasis)

| Gene Name                     | Obs | Asymptotic Normal (95% Conf. Interval) |         | Std. Error | Roc Area |
|-------------------------------|-----|----------------------------------------|---------|------------|----------|
|                               |     | Min                                    | Max     |            |          |
| <i>MTA-1</i>                  | 100 | 0.40542                                | 0.63545 | 0.0587     | 0.5204   |
| <i>LEF-1</i>                  | 100 | 0.40362                                | 0.64693 | 0.0622     | 0.5251   |
| <i>IL2RA</i>                  | 100 | 0.39427                                | 0.62761 | 0.0595     | 0.5109   |
| <i>IL2RB</i>                  | 100 | 0.45967                                | 0.69520 | 0.0601     | 0.5774   |
| <i>EGFR</i>                   | 100 | 0.41966                                | 0.64898 | 0.0585     | 0.5343   |
| <i>MAP2K1</i>                 | 100 | 0.38429                                | 0.61742 | 0.0595     | 0.5009   |
| <i>BUB1</i>                   | 100 | 0.38234                                | 0.62238 | 0.0612     | 0.5024   |
| <i>RHO-A</i>                  | 100 | 0.44081                                | 0.69991 | 0.0661     | 0.5704   |
| <i>CD-44</i>                  | 100 | 0.40102                                | 0.65346 | 0.0644     | 0.5272   |
| <i>CD-133</i>                 | 100 | 0.41779                                | 0.66115 | 0.0621     | 0.5395   |
| <i>PCSK</i>                   | 100 | 0.46159                                | 0.69542 | 0.0597     | 0.5785   |
| <i>SMAD4</i>                  | 100 | 0.39785                                | 0.62875 | 0.0589     | 0.5133   |
| <i>VANGL-1</i>                | 100 | 0.52410                                | 0.75561 | 0.0591     | 0.6399   |
| <i>FOLH1</i>                  | 100 | 0.39754                                | 0.63420 | 0.0604     | 0.5159   |
| <i>HES-1</i>                  | 100 | 0.43953                                | 0.67716 | 0.0606     | 0.5583   |
| <i>ANXA3</i>                  | 100 | 0.45440                                | 0.69575 | 0.0616     | 0.5751   |
| <i>NOTCH-1</i>                | 100 | 0.37348                                | 0.60721 | 0.0596     | 0.4903   |
| <i>SMAD2</i>                  | 100 | 0.46244                                | 0.69243 | 0.0587     | 0.5774   |
| <i>PITX2</i>                  | 100 | 0.40716                                | 0.65075 | 0.0621     | 0.5290   |
| <i>TGF-<math>\beta</math></i> | 100 | 0.48512                                | 0.68214 | 0.0501     | 0.5587   |

Table S2: Logistic Regression Test of the 20 Genes (Analysis – Stage)

| Gene Name    | Obs | Asymptotic Normal (95% Conf. Interval) |         | Std. Error | Roc Area |
|--------------|-----|----------------------------------------|---------|------------|----------|
|              |     | Min                                    | Max     |            |          |
| <i>MTA-1</i> | 100 | 0.40542                                | 0.63545 | 0.0587     | 0.5204   |
| <i>LEF-1</i> | 100 | 0.40094                                | 0.63352 | 0.0593     | 0.5172   |

|                               |     |         |         |        |        |
|-------------------------------|-----|---------|---------|--------|--------|
| <b>IL2RA</b>                  | 100 | 0.43423 | 0.66192 | 0.0581 | 0.5481 |
| <b>IL2RB</b>                  | 100 | 0.41213 | 0.64155 | 0.0585 | 0.5268 |
| <b>EGFR</b>                   | 100 | 0.39573 | 0.62750 | 0.0591 | 0.5116 |
| <b>MAP2K1</b>                 | 100 | 0.33020 | 0.55762 | 0.0580 | 0.4439 |
| <b>BUB1</b>                   | 100 | 0.38855 | 0.61826 | 0.0612 | 0.5034 |
| <b>RHO-A</b>                  | 100 | 0.45397 | 0.68986 | 0.0602 | 0.5719 |
| <b>CD-44</b>                  | 100 | 0.36723 | 0.59992 | 0.0594 | 0.4836 |
| <b>CD-133</b>                 | 100 | 0.41237 | 0.64292 | 0.0588 | 0.5276 |
| <b>PCSK-7</b>                 | 100 | 0.29640 | 0.52491 | 0.0583 | 0.4107 |
| <b>SMAD4</b>                  | 100 | 0.40131 | 0.63034 | 0.0584 | 0.5158 |
| <b>VANGL-1</b>                | 100 | 0.49699 | 0.72136 | 0.0572 | 0.6092 |
| <b>FOLH1</b>                  | 100 | 0.41903 | 0.64908 | 0.0587 | 0.5341 |
| <b>HES-1</b>                  | 100 | 0.42989 | 0.65986 | 0.0587 | 0.5449 |
| <b>ANXA3</b>                  | 100 | 0.40782 | 0.64106 | 0.0595 | 0.5244 |
| <b>NOTCH-1</b>                | 100 | 0.41026 | 0.64022 | 0.0587 | 0.5252 |
| <b>SMAD2</b>                  | 100 | 0.44960 | 0.67740 | 0.0581 | 0.5635 |
| <b>PITX2</b>                  | 100 | 0.38402 | 0.61438 | 0.0588 | 0.4992 |
| <b>TGF-<math>\beta</math></b> | 100 | 0.40612 | 0.63675 | 0.0588 | 0.5214 |
